# Supplementary material
Source: PubMed Central journal article supplement (PMC7199080)
Supplement: MCN-15-e12639-s001.pdf [file MCN-15-e12639-s001.pdf]

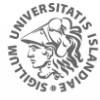

Number:

## FOOD SELECTION

**Do you avoid or not eat certain types of food?      Yes \_\_\_      No \_\_\_**

**If yes**, mark the types of food that you avoid or do not eat.

|                        |  |
|------------------------|--|
|                        |  |
| <b>Cereal products</b> |  |
| <b>Vegetables</b>      |  |
| <b>Fruits</b>          |  |
| <b>Fish</b>            |  |
| <b>Meat</b>            |  |
| <b>Eggs</b>            |  |
| <b>High-fat foods</b>  |  |
| <b>Dairy products</b>  |  |

## CONSUMPTION OF VARIOUS FOODS

Keeping in mind the last 4 weeks, put one cross in each row.

**How many times per month or week or day do you eat the following types of food?**  
(Questions on fish and meat (including processed meat products) apply to main meals, not sandwich meats or spreads.)

|                                                          | Per month |   |     | Per week |     |     | Per day |   |     |    |
|----------------------------------------------------------|-----------|---|-----|----------|-----|-----|---------|---|-----|----|
|                                                          | <1        | 1 | 2-3 | 1        | 2-3 | 4-6 | 1       | 2 | 3-4 | ≥5 |
| Vegetables                                               |           |   |     |          |     |     |         |   |     |    |
| Fruits                                                   |           |   |     |          |     |     |         |   |     |    |
| Lean fish (e.g., haddock or cod)                         |           |   |     |          |     |     |         |   |     |    |
| Fatty fish (e.g., salmon, trout or large halibut)        |           |   |     |          |     |     |         |   |     |    |
| Red meat (beef, lamb or pork)                            |           |   |     |          |     |     |         |   |     |    |
| Poultry                                                  |           |   |     |          |     |     |         |   |     |    |
| Processed meat products, meat dough products or sausages |           |   |     |          |     |     |         |   |     |    |
| Soured dairy products (sour milk, skyr or yogurt)        |           |   |     |          |     |     |         |   |     |    |
| Cheese                                                   |           |   |     |          |     |     |         |   |     |    |
| Whole-grain products, other than bread*                  |           |   |     |          |     |     |         |   |     |    |
| Bean dishes, nuts or seeds (not in breads)               |           |   |     |          |     |     |         |   |     |    |
| French fries and/or packaged snacks                      |           |   |     |          |     |     |         |   |     |    |
| Cakes and/or crackers                                    |           |   |     |          |     |     |         |   |     |    |
| Candy and/or ice cream                                   |           |   |     |          |     |     |         |   |     |    |

\*E.g., brown rice, barley or whole-wheat pasta, as accompaniment or part of main meals.

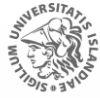

## HIGH-FAT FOODS

Keeping in mind the last 4 weeks, put one cross on each row.

How often do you use the following high-fat foods?

|                                               | Per month |   |     | Per week |     |     | Per day |   |     |    |
|-----------------------------------------------|-----------|---|-----|----------|-----|-----|---------|---|-----|----|
|                                               | <1        | 1 | 2-3 | 1        | 2-3 | 4-6 | 1       | 2 | 3-4 | ≥5 |
| Oil or other soft fat for food preparation    |           |   |     |          |     |     |         |   |     |    |
| Butter or other hard fat for food preparation |           |   |     |          |     |     |         |   |     |    |
| Butter or oil-blended butter on bread         |           |   |     |          |     |     |         |   |     |    |

## BEVERAGES

Keeping in mind the last 4 weeks, put one cross on each row.

How many portions per month or per week or per day do you drink of the following beverages?

Assume that one portion is about 250 ml.

Remember to include in the estimate milk on morning cereal or mush and in coffee.  
Carbonated or noncarbonated beverages include all types of carbonated beverages, sports drink, fruit drink (other than pure fruit juices) and energy drink.

|                                                          | Per month |   |     | Per week |     |     | Per day |   |     |    |
|----------------------------------------------------------|-----------|---|-----|----------|-----|-----|---------|---|-----|----|
|                                                          | <1        | 1 | 2-3 | 1        | 2-3 | 4-6 | 1       | 2 | 3-4 | ≥5 |
| Pure fruit juice                                         |           |   |     |          |     |     |         |   |     |    |
| Whole milk                                               |           |   |     |          |     |     |         |   |     |    |
| Low-fat milk                                             |           |   |     |          |     |     |         |   |     |    |
| Low-fat milk fortified with vitamin D                    |           |   |     |          |     |     |         |   |     |    |
| Fortified nonfat milk (vitamin D- and protein-fortified) |           |   |     |          |     |     |         |   |     |    |
| Nonfat milk                                              |           |   |     |          |     |     |         |   |     |    |
| Carbonated and noncarbonated drinks with added sugar     |           |   |     |          |     |     |         |   |     |    |
| Carbonated and noncarbonated drinks with sweeteners      |           |   |     |          |     |     |         |   |     |    |
| Coffee                                                   |           |   |     |          |     |     |         |   |     |    |
| Alcohol                                                  |           |   |     |          |     |     |         |   |     |    |



## BREAD

Keeping in mind the last 4 weeks, put one cross on each row.

How many slices per month or per week or per day do you eat of the following kinds of bread?

|                                                                                                                                                                    | Per month |   |     | Per week |     |     | Per day |   |     |    |
|--------------------------------------------------------------------------------------------------------------------------------------------------------------------|-----------|---|-----|----------|-----|-----|---------|---|-----|----|
|                                                                                                                                                                    | <1        | 1 | 2-3 | 1        | 2-3 | 4-6 | 1       | 2 | 3-4 | ≥5 |
| <b>Whole-grain bread.</b> This means breads marked with the Keyhole, or specified as fiber rich or whole grained.                                                  |           |   |     |          |     |     |         |   |     |    |
| <b>Other breads.</b> This means “usual” wheat breads (Heimilisbrauð, Bónus/Krónu-brauð, ciabatta, soft-cheese bows, etc.)                                          |           |   |     |          |     |     |         |   |     |    |
| <b>Rye bread with added sugar.</b> Here, this pertains only to Icelandic rye bread. Please record other rye bread, e.g., Danish rye bread, as whole-grained bread. |           |   |     |          |     |     |         |   |     |    |

## SUPPLEMENTS

Keeping in mind the last 4 weeks, put one cross on each row.

How often per month or per week or per day do you use the following supplements?

|                                      | Per month |   |     | Per week |     |     | Per day |   |     |    |
|--------------------------------------|-----------|---|-----|----------|-----|-----|---------|---|-----|----|
|                                      | <1        | 1 | 2-3 | 1        | 2-3 | 4-6 | 1       | 2 | 3-4 | ≥5 |
| Cod liver oil                        |           |   |     |          |     |     |         |   |     |    |
| Vitamin D                            |           |   |     |          |     |     |         |   |     |    |
| Folate/folacin/folic acid            |           |   |     |          |     |     |         |   |     |    |
| Iron                                 |           |   |     |          |     |     |         |   |     |    |
| Multivitamins with vitamin A         |           |   |     |          |     |     |         |   |     |    |
| Multivitamins without vitamin A      |           |   |     |          |     |     |         |   |     |    |
| Other supplements or food additives* |           |   |     |          |     |     |         |   |     |    |

\*Other supplements, which ones? \_\_\_\_\_

Thank you for participating!
